- flurane anesthesia. *Ann Intern Med* 69: 1229-1236, 1968
- Lebowitz MH: Nephrogenic diabetes insipidus following methoxyflurane anesthesia. A report of two cases. *Anesth Analg* 48:233-236, 1969
  - Kuzucu EY: Methoxyflurane, tetracycline and renal failure. *JAMA* 211:1162-1164, 1970
  - Taves DR, Fry BV, Freeman RB, et al.: Toxicity following methoxyflurane anesthesia. II. Fluoride concentration in nephrotoxicity. *JAMA* 214:91-95, 1970
  - Goldemberg L: Tratamiento de la enfermedad de Basedon: y del hipertiroidismo por fluor. *Rev Soc Med Int Soc Tisiol* 6:217-242, 1930
  - Taves DR, Gillies AJ, Freeman RB, et al.: Toxicity following methoxyflurane anesthesia. III. Hemodialysis of metabolites. *JAMA* 214:96-97, 1970
  - Lowe HJ: Letter to the Editor. *JAMA* 1970 (in press)
  - Gillies AJ: Personal communication, 1970
  - Cale JO, Parks CR, Jenkins MT: Hepatic and renal effects of methoxyflurane in dogs. *ANESTHESIOLOGY* 23:248-250, 1962
  - North WC, Stephen CR: A second look at methoxyflurane: Four years of experience. *Anesth Analg* 45:117-125, 1966
  - Gauert WB, Buschman D, Parmley RT, et al.: Renal function associated with methoxyflurane anesthesia. *Southern Med J* 62:1487-1490, 1969
  - Maynard DR, Stephen CR, Baxter CR: Methoxyflurane and renal function (in press)
  - Van Dyke RA, Chenoweth MB: Metabolism of volatile anesthetics. *ANESTHESIOLOGY* 26: 348-357, 1965
  - Holaday DA, Rudofsky S, Treuhaft PS: Metabolic degradation of methoxyflurane in man. Presented at the Annual Meeting of the American Society of Anesthesiologists, October 1970
  - Fiserova-Bergerova V: Effects of pretreatment on fluoride levels in bones following methoxyflurane and Ethrane anesthesia. Presented at the Annual Meeting of the American Society of Anesthesiologists, October 1970
  - Crout JR, Brown BR Jr: Anesthetic management of pheochromocytoma: The value of phenoxylbenzamine and methoxyflurane. *ANESTHESIOLOGY* 30:29-36, 1969
  - Jacques A, Hudon F: Effect of epinephrine on the human heart during methoxyflurane anaesthesia. *Canad Anaesth Soc J* 10:53-54, 1963

### Drugs and Their Actions

**CARDIAC OUTPUT AND LIDOCAINE METABOLISM** A high incidence of toxic reactions to intravenously-administered lidocaine is apparent in patients with markedly depressed circulatory function. To evaluate this situation, the relationship between cardiac output, hepatic blood flow, and lidocaine metabolism was studied in 17 patients at time of cardiac catheterization during the constant infusion of lidocaine at a rate of 40  $\mu\text{g}/\text{kg}/\text{min}$ . Hepatic blood flow was estimated by a dye-dilution technique. The mean arterial lidocaine concentration (MALC) was significantly higher in patients whose cardiac indexes were below 2.5  $\text{l}/\text{min}/\text{m}^2$ . The relationship can be expressed by the equation:  $\text{MALC } (\mu\text{g}/\text{ml}) = 0.13 \text{ C.I.} + 0.207$ . A similar relationship was found between the steady-state arterial lidocaine concentration and estimated hepatic blood flow (EHBf), with a significant rise in lidocaine levels when EHBf fell below 750  $\text{ml}/\text{min}/\text{m}^2$ . Since a direct linear correlation was found between cardiac index and EHBf, the authors suggest that the rate of metabolic breakdown of lidocaine depends on cardiac output, and intravenous dosage must take this factor into account in order to prevent the possible production of high blood levels and clinical toxicity. (*Stenson, R. E., et al.: Interrelationship of Hepatic Blood Flow, Cardiac Output and Blood Levels of Lidocaine in Man, Circulation* 43: 205-211, 1971.) EDITOR'S COMMENT: It is surprising how little information about the relationship between cardiac output and drug metabolism is available in the anesthesia literature. Considering the rigidity of the drug dosages we employ (i.e., units of drug/unit body weight), these findings open a new vista of potential clinical investigation.
